# Supplementary material
Source: PubMed Central journal article supplement (PMC6754270)

**Compound characterization data.** Related to Figure 3 and STAR Methods.

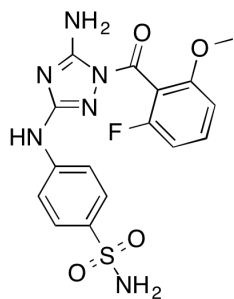

**Compound 2.**

4-((5-amino-1-(2-fluoro-6-methoxybenzoyl)-1H-1,2,4-triazol-3-yl)amino)benzenesulfonamide

MS-ESI [MH<sup>+</sup>]: expected for C<sub>16</sub>H<sub>15</sub>FN<sub>6</sub>O<sub>4</sub>S 407.4, found 408. <sup>1</sup>H NMR (600 MHz, DMSO-*d*<sub>6</sub>) δ 9.76 (s, 1H), 7.90 (br.s., 2H), 7.58 (m, 1H), 7.56 (d, *J* = 8.6, 2H), 7.46 (d, *J* = 8.8, 2H), 7.07 (m, 3H), 6.99 (t, *J* = 8.7, 1H), 3.82 (s, 3H).

compound 2  
1H-600MHz, DMSOd6

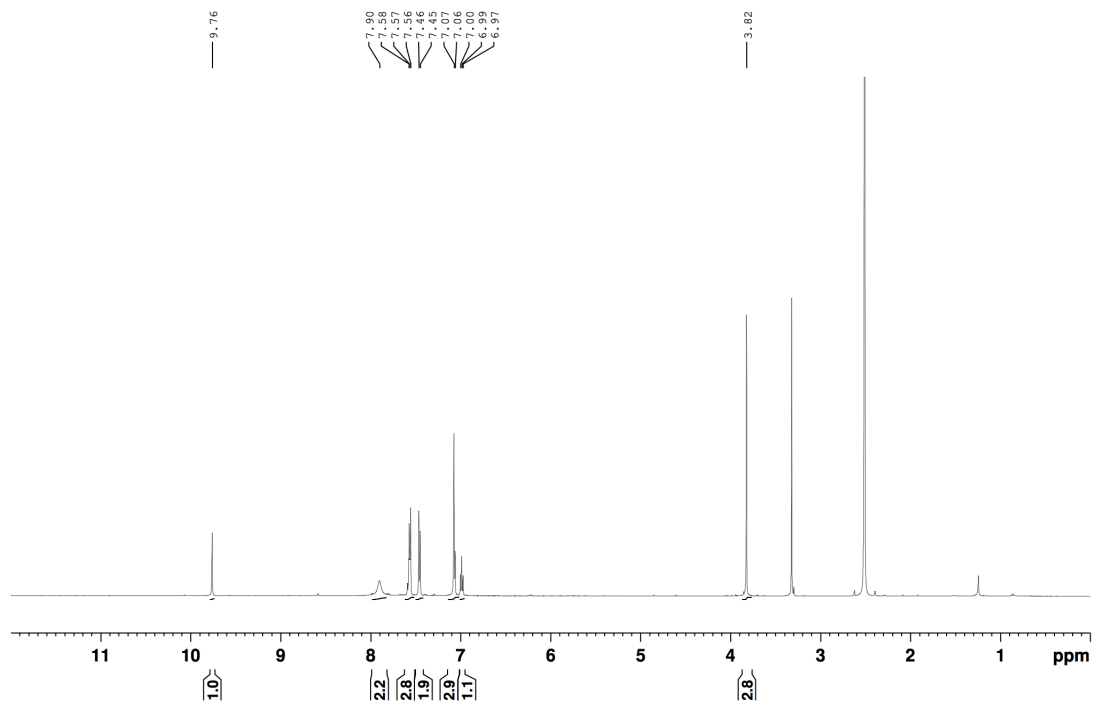

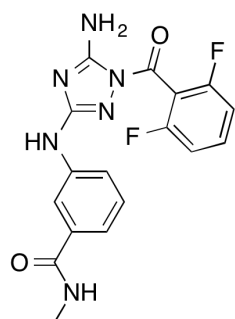

**Compound 3.**

3-((5-amino-1-(2,6-difluorobenzoyl)-1H-1,2,4-triazol-3-yl)amino)-N-methylbenzamide

MS-ESI  $[MH^+]$ : expected for  $C_{17}H_{14}F_2N_6O_2$  372.3, found 373.  $^1H$  NMR (600 MHz,  $DMSO-d_6$ )  $\delta$  9.47 (s, 1H), 8.14 (d,  $J = 4.5$ , 1H), 7.95 (br.s., 2H), 7.76 (s, 1H), 7.70 (m, 1H), 7.49 (d,  $J = 7.5$ , 1H), 7.31 (t,  $J = 8.3$ , 2H), 7.19 (m, 2H), 2.73 (d,  $J = 4.5$ , 3H).

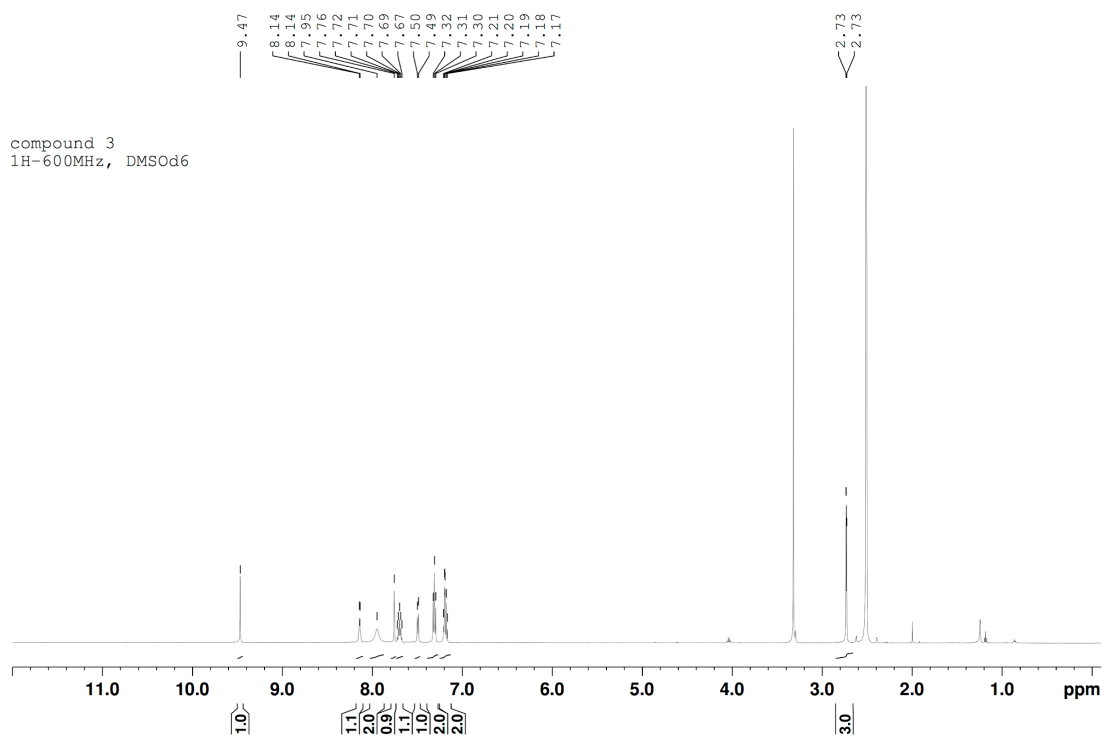

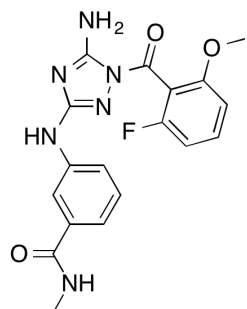

**Compound 4.**

3-((5-amino-1-(2-fluoro-6-methoxybenzoyl)-1H-1,2,4-triazol-3-yl)amino)-N-methylbenzamide

MS-ESI [ $MH^+$ ]: expected for  $C_{18}H_{17}FN_6O_3$  385.4, found 385.1.  $^1H$  NMR (600 MHz,  $DMSO-d_6$ )  $\delta$  9.38 (s, 1H), 8.13 (d,  $J = 4.6$ , 1H), 7.85 (br.s., 2H), 7.73 (s, 1H), 7.53 (m, 2H), 7.17 (m, 2H), 7.03 (d,  $J = 8.4$ , 1H), 6.95 (t,  $J = 8.7$ , 1H), 3.83 (s, 3H), 2.80 (d,  $J = 4.5$ , 0.6H), 2.73 (d,  $J = 4.5$ , 2.4H).

compound 4  
 $^1H$ -600MHz,  $DMSO-d_6$

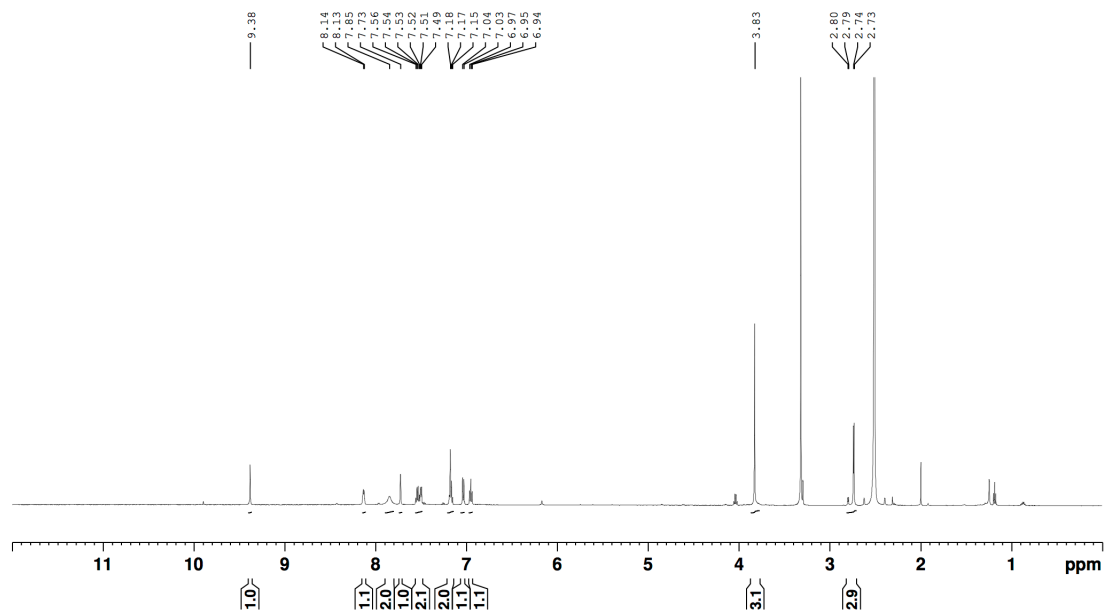

Supplement: NIHMS1532976-supplement-1.pdf [file NIHMS1532976-supplement-1.pdf]
